# Supplementary material
Source: HighWire-hosted journal article supplement (http://thorax.bmj.com/highwire/filestream/173871/field_highwire_adjunct_files/0/649798webonly.docx)
Supplement: 649798webonly.docx [file 649798webonly.docx]

Table 3: Protein expression between blood and BAL neutrophils using paired analysis.

All data expressed as Mean units of ABC x 106

Mean Diff= Mean difference in protein expression between blood and BAL neutrophils.

Table 3(a)

|  |  | Total MPO | | Total CD11b | |
| --- | --- | --- | --- | --- | --- |
| Group |  | Mean diff | SEM | Mean diff | SEM |
| Preterm |  | -0.12 | 0.04 | -0.035 | 0.001 |
| (n=16) |  |  |  |  |  |
|  |  | P=0.011 |  | P=0.032 |  |
| Term |  | -0.24 | 0.05 | -0.021 | 0.001 |
| (n=15) |  |  |  |  |  |
|  |  | P=0.025 |  | P=0.03 |  |
| Control |  | -0.002 | 0.001 | -0.001 | 0.001 |
| (n=8) |  |  |  |  |  |
|  |  | P=0.89 |  | P=0.73 |  |

Table 3(b)

|  |  | Cell Surface TLR2 | | Cell Surface TLR4 | | Total TLR2 | | Total TLR4 | |
| --- | --- | --- | --- | --- | --- | --- | --- | --- | --- |
| Group |  | Mean diff | SEM | Mean diff | SEM | Mean diff | SEM | Mean diff | SEM |
| Preterm |  | -0.0006 | 0.001 | -0.001 | 0.001 | -0.003 | 0.001 | -0.22 | 0.03 |
| (n=16) |  |  |  |  |  |  |  |  |  |
|  |  | P=0.56 |  | P=0.32 |  | P=0.80 |  | P=0.024 |  |
| Term |  | -0.0005 | 0.001 | -0.0005 | 0.001 | -0.001 | 0.001 | -0.15 | 0.02 |
| (n=15) |  |  |  |  |  |  |  |  |  |
|  |  | P=0.43 |  | P=0.46 |  | P=0.63 |  | P=0.036 |  |
| Control |  | -0.003 | 0.001 | -0.001 | 0.001 | -0.003 |  | -0.55 | 0.01 |
| (n=8) |  |  |  |  |  |  |  |  |  |
|  |  | P=0.69 |  | P=0.2 |  | P=0.89 |  | P=0.026 |  |
